# Supplementary material for: Socioeconomic representativeness of Australian, Canadian and British cohorts from the paediatric diabetes AdDIT study: comparisons to regional and national data
Source: Springer Nature journal article supplement (doi:10.1186/s12916-023-03222-w), 2023-12-20

## ADDITIONAL FILE 1

**Table S1.** Country-specific measures of deprivation, and sources of regional and national reference type 1 diabetes population data.

| <b>Characteristics</b>                      | <b>AddIT UK</b>                                            | <b>AddIT Canada</b>                                                                            | <b>AddIT Australia</b>                                    |
|---------------------------------------------|------------------------------------------------------------|------------------------------------------------------------------------------------------------|-----------------------------------------------------------|
| <b>Deprivation Measure</b>                  | Index of Multiple Deprivation (IMD) 2015                   | Canadian Marginalization Index (CAN-Marg) 2016                                                 | Socioeconomic Indices for Areas (SEIFA) 2016              |
| <b>Sub-Domain</b>                           | N/A                                                        | Material Resources (MR)                                                                        | Index of Relative Socioeconomic Disadvantage (IRSD)       |
| <b>Geographic Unit</b>                      | Lower-layer Sorting Output Area (LSOA)                     | Dissemination Area (DA)                                                                        | Postcode Area (POA)                                       |
| <b>Pediatric Type 1 Diabetes References</b> | UK                                                         | Canada                                                                                         | Australia                                                 |
| <b>Regional</b>                             | National Pediatric Diabetes Audit (NPDA) 2015-16 & 2019-20 | Regional data from the Hospital for Sick Children                                              | Australasian Diabetes Data Network (ADDN)                 |
| <b>National</b>                             | National Pediatric Diabetes Audit (NPDA) 2015-16           | Canadian Chronic Disease Surveillance System (CCDSS) 2016 & Pediatric Diabetes Network 2017-18 | Australian Institute of Health & Welfare Data (AIHW) 2018 |

**Table S2:** Raw counts and proportions of the UK, Canadian and Australian cohorts of AddIT across deprivation quintiles. Intra-quintile differences are presented.

| AddIT Cohort | Reference Population | Type     | Index     | Quintile   | AddIT |        | Reference |      | OR    | 95% CI |       | P       |
|--------------|----------------------|----------|-----------|------------|-------|--------|-----------|------|-------|--------|-------|---------|
|              |                      |          |           |            | N     | %      | N         | %    |       | Low    | High  |         |
| UK           | NPDA                 | National | IMD 2015  | Q1 (most)  | 8     | 4.6    | 5,823     | 21.6 | 0.176 | 0.075  | 0.354 | <0.0001 |
|              |                      |          |           | Q2         | 11    | 6.4    | 5,428     | 20.1 | 0.271 | 0.132  | 0.497 | <0.0001 |
|              |                      |          |           | Q3         | 39    | 22.5   | 5,198     | 19.2 | 1.224 | 0.833  | 1.762 | 0.247   |
|              |                      |          |           | Q4         | 50    | 28.9   | 5,256     | 19.4 | 1.686 | 1.187  | 2.364 | 0.0027  |
|              |                      |          |           | Q5 (least) | 65    | 37.6   | 5,317     | 19.7 | 2.460 | 1.777  | 3.383 | <0.0001 |
|              |                      |          |           | Total      | 173   | -      | 27,052    | -    |       |        |       |         |
|              | NPDA subset          | Regional | IMD 2015  | Q1 (most)  | 8     | 4.6    | 4,700     | 23.3 | 0.160 | 0.068  | 0.323 | <0.0001 |
|              |                      |          |           | Q2         | 11    | 6.4    | 4,338     | 21.5 | 0.248 | 0.122  | 0.457 | <0.0001 |
|              |                      |          |           | Q3         | 39    | 22.5   | 3,921     | 19.4 | 1.209 | 0.822  | 1.742 | 0.287   |
|              |                      |          |           | Q4         | 50    | 28.9   | 3,641     | 18.0 | 1.850 | 1.301  | 2.595 | <0.001  |
|              |                      |          |           | Q5 (least) | 65    | 37.6   | 3,609     | 17.9 | 2.768 | 1.999  | 3.808 | <0.0001 |
| Total        |                      |          |           | 173        | -     | 20,210 | -         |      |       |        |       |         |
| Canada       | PDN/CCDSS            | National | MR 2016   | Q1 (least) | 92    | 29.5   | 4,780     | 20.0 | 1.673 | 1.294  | 2.148 | <0.0001 |
|              |                      |          |           | Q2         | 88    | 28.2   | 4,780     | 20.0 | 1.571 | 1.211  | 2.024 | <0.001  |
|              |                      |          |           | Q3         | 58    | 18.6   | 4,780     | 20.0 | 0.913 | 0.673  | 1.221 | 0.569   |
|              |                      |          |           | Q4         | 36    | 11.5   | 4,780     | 20.0 | 0.522 | 0.357  | 0.741 | <0.001  |
|              |                      |          |           | Q5 (most)  | 38    | 12.2   | 4,780     | 20.0 | 0.555 | 0.384  | 0.782 | <0.001  |
|              |                      |          |           | Total      | 312   | -      | 23,900    | -    |       |        |       |         |
|              | SickKids             | Regional | MR 2016   | Q1 (least) | 92    | 29.5   | 225       | 30.1 | 0.970 | 0.717  | 1.307 | 0.883   |
|              |                      |          |           | Q2         | 88    | 28.2   | 141       | 18.9 | 1.688 | 1.225  | 2.319 | 0.001   |
|              |                      |          |           | Q3         | 58    | 18.6   | 103       | 13.8 | 1.427 | 0.984  | 2.057 | 0.049   |
|              |                      |          |           | Q4         | 36    | 11.5   | 114       | 15.3 | 0.724 | 0.471  | 1.094 | 0.122   |
|              |                      |          |           | Q5 (most)  | 38    | 12.2   | 164       | 22.0 | 0.493 | 0.328  | 0.729 | <0.001  |
| Total        |                      |          |           | 312        | -     | 747    | -         |      |       |        |       |         |
| Australia    | AIHW                 | National | IRSD 2016 | Q1 (most)  | 10    | 6.9    | 4,207     | 20.4 | 0.292 | 0.137  | 0.554 | <0.0001 |
|              |                      |          |           | Q2         | 19    | 13.2   | 4,361     | 21.1 | 0.568 | 0.331  | 0.926 | 0.0182  |
|              |                      |          |           | Q3         | 34    | 23.6   | 4,209     | 20.4 | 1.209 | 0.796  | 1.793 | 0.350   |
|              |                      |          |           | Q4         | 29    | 20.1   | 4,099     | 19.8 | 1.019 | 0.652  | 1.545 | 0.917   |
|              |                      |          |           | Q5 (least) | 52    | 36.1   | 3,788     | 18.3 | 2.518 | 1.753  | 3.583 | <0.0001 |
|              |                      |          |           | Total      | 144   | -      | 20,664    | -    |       |        |       |         |
|              | ADDN                 | Regional | IRSD 2016 | Q1 (most)  | 10    | 6.9    | 445       | 7.2  | 0.955 | 0.444  | 1.828 | 0.999   |
|              |                      |          |           | Q2         | 19    | 13.2   | 831       | 13.5 | 0.971 | 0.562  | 1.591 | 0.999   |
|              |                      |          |           | Q3         | 34    | 23.6   | 1,324     | 21.6 | 1.123 | 0.738  | 1.673 | 0.540   |
|              |                      |          |           | Q4         | 29    | 20.1   | 1,312     | 21.4 | 0.928 | 0.592  | 1.411 | 0.837   |
|              |                      |          |           | Q5 (least) | 52    | 36.1   | 2,226     | 36.3 | 0.993 | 0.690  | 1.417 | 0.999   |
| Total        |                      |          |           | 144        | -     | 6,138  | -         |      |       |        |       |         |

**Figure S1.** Flowchart of study participants from the original AddIT UK, AddIT Canada and AddIT Australia cohorts included in the current study.

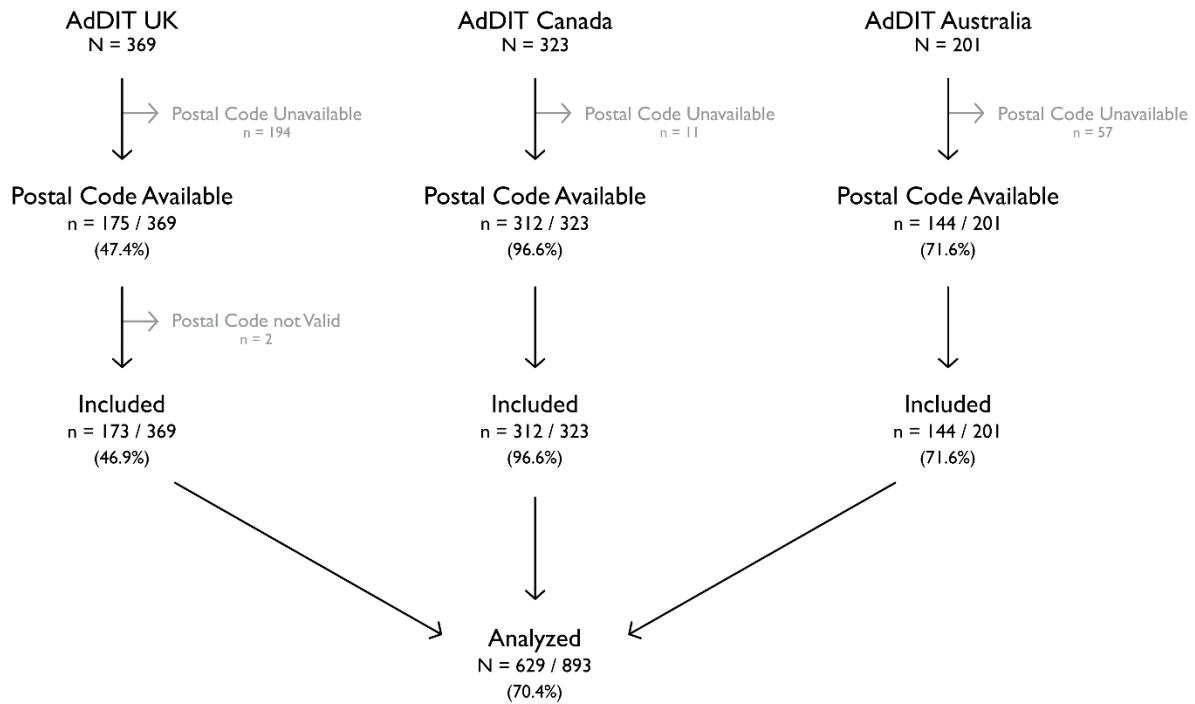

**Figure S2.** Distribution of the Experimental and Observational study arms among the A) AddIT UK and B) AddIT Canada cohorts across country-specific deprivation quintiles. Bars in colour represent the Experimental Arm whereas bars in white represent the Observational Arm. All participants of the AddIT Australia cohort were part of the Experimental Arm and thus not included.

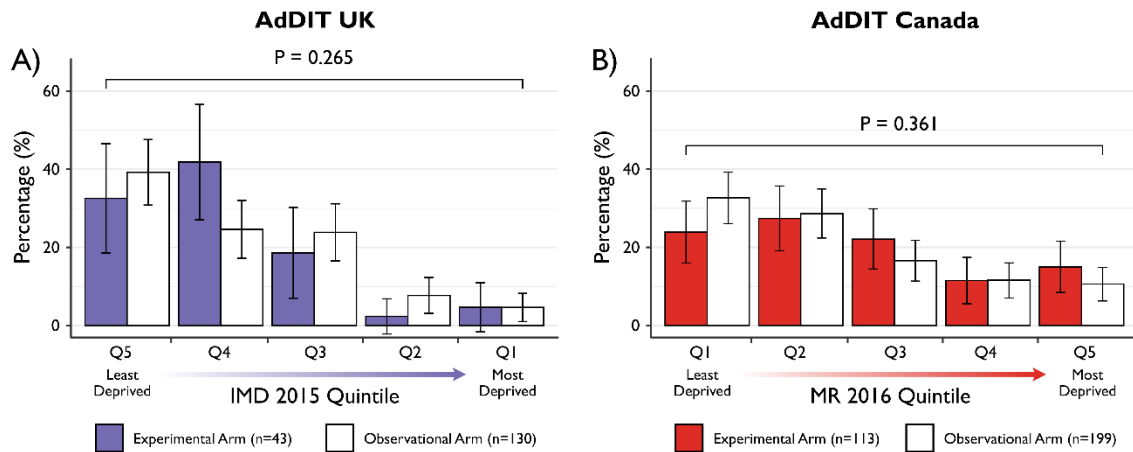

Supplement: MOESM1 [file 26551574]
